# Supplementary material for: Dietary and/or physical activity interventions in women with overweight or obesity prior to fertility treatment: protocol for a systematic review and individual participant data meta-analysis
Source: HighWire-hosted journal article supplement (doi:10.1136/bmjopen-2022-065206), 2022-11-01
Supplement: bmjopen-2022-065206supp001_data_supplement.pdf [file bmjopen-2022-065206supp001_data_supplement.pdf]

**Supplementary file**

## Search strategy

## Ovid MEDLINE(R)

- 1 exp infertility/
- 2 infertil\$.tw.
- 3 subfertil\$.tw.
- 4 fertility.tw.
- 5 exp reproductive techniques, assisted/
- 6 exp ovulation induction/
- 7 exp insemination, artificial/
- 8 exp embryo transfer/
- 9 exp fertilization in vitro/
- 10 exp sperm injections, intracytoplasmic/
- 11 ART.tw.
- 12 assisted reproduct\$.tw.
- 13 ovulat\$ induc\$.tw.
- 14 (ovar\$ adj2 stimulat\$.tw.
- 15 superovulat\$.tw.
- 16 ovarian hyperstimulation.tw.
- 17 COH.tw.
- 18 intrauterine insemination\$.tw.
- 19 artificial insemination\$.tw.
- 20 IUI.tw.
- 21 vitro fertili?ation.tw.
- 22 ivf.tw.

- 23 icsi.tw.
- 24 intracytoplasmic sperm injection\$.tw.
- 25 exp polycystic ovary syndrome/
- 26 polycystic ovar\$.tw.
- 27 PCOS.tw.
- 28 PCO.tw.
- 29 exp anovulation/
- 30 anovulat\$.tw.
- 31 oligo ovulat\$.tw.
- 32 or/1-31
- 33 exp obesity/
- 34 exp overweight/
- 35 exp body weight/
- 36 (obese or obesity).tw.
- 37 overweight.tw.
- 38 or/33-37
- 39 exp body weight changes/
- 40 exp weight loss/
- 41 exp body weight/
- 42 weight loss.tw.
- 43 weight reduc\$.tw.
- 44 exp weight reduction programs/
- 45 exp diet, reducing/
- 46 exp diet therapy/
- 47 exp food, formulated/

- 48 exp diet, carbohydrate-restricted/  
49 exp diet, healthy/  
50 exp dietary supplements/  
51 exp energy intake/  
52 exp caloric restriction/  
53 exp fasting/  
54 diet.tw.  
55 calorie controlled.tw.  
56 calorie restrict\$.tw.  
57 exp nutrition therapy/  
58 meal replacement\$.tw.  
59 exp exercise/  
60 exp exercise therapy/  
61 physical activit\$.tw.  
62 exp sports/ or exp bicycling/ or exp running/ or exp swimming/ or exp walking/  
63 fitness.tw.  
64 or/39-63  
65 clinical trials as topic.sh.  
66 exp randomized controlled trial/  
67 exp randomization/  
68 randomi?ed controlled trial\$.tw.  
69 rct.tw.  
70 controlled clinical trial.pt.  
71 random allocation.tw.  
72 randomly.tw.

- 73 (allocated adj2 random).tw.
- 74 or/65-73
- 75 exp animals/ not humans.sh.
- 76 74 not 75
- 77 32 and 38 and 64 and 76
